# Supplementary material for: Genome Wide Analysis Reveals Zic3 Interaction with Distal Regulatory Elements of Stage Specific Developmental Genes in Zebrafish
Source: PLoS Genet. 2013 Oct 31;9(10):e1003852. doi: 10.1371/journal.pgen.1003852 (PMC3814314; doi:10.1371/journal.pgen.1003852)
Supplement: Table S5 — Genes with ChIP-seq peak at 8 hpf. List of genes expressed differentially at 8 hpf with at least one ChIP-seq peak within 100 kb of their TSS. (XLS) [file pgen.1003852.s013.xls]

## Sheet: Sheet1
Table S5. List of microarray genes with peak (8 hpf)
chromosome	start	end	strand	gene symbol	Refseq ID	distance to peak
chr19	20594042	20596307	-	npy	NM_131074	46185
chr1	134729	170748	+	zgc:152925	NM_001076721	87238
chr8	43508031	43553423	-	golga1	NM_200838	13204
chr8	43508031	43553423	-	golga1	NM_200838	13204
chr3	40164997	40174968	+	syngr3	NM_001020591	32049
chr24	31176294	31183408	-	zgc:112054	NM_001017664	-54724
chr25	20851468	20872828	-	kctd15a	NM_001006012	31471
chr24	31176294	31183408	-	zgc:112054	NM_001017664	-54804
chr24	31176294	31183408	-	zgc:112054	NM_001017664	-63989
chr15	16417524	16425071	-	tubd1	NM_001002093	-45230
chr15	16417524	16425071	-	tubd1	NM_001002093	-45315
chr15	16417524	16425071	-	tubd1	NM_001002093	99713
chr19	20364800	20367910	-	zgc:55843	NM_214707	6973
chr19	20364800	20367910	-	zgc:55843	NM_214707	6901
chr23	26973866	26991690	+	zgc:158263	NM_001080679	-38112
chr6	41049790	41066079	-	slc6a13	NM_001004533	-83072
chr3	12464864	12482554	-	cyp2k8	NM_001083834	74284
chr6	41049790	41066079	-	slc6a13	NM_001004533	-12148
chr6	41049790	41066079	-	slc6a13	NM_001004533	-12148
chr19	31695522	31713632	+	si:ch211-215a10.4	NM_001082846	46306
chr6	41049790	41066079	-	slc6a13	NM_001004533	-83072
chr19	31695522	31713632	+	si:ch211-215a10.4	NM_001082846	70737
chr16	29670787	29730936	+	invs	NM_152970	18223
chr16	29670787	29730936	+	invs	NM_152970	-78085
chr16	29645438	29670566	-	erp44	NM_200892	18002
chr16	29645438	29670566	-	erp44	NM_200892	-78306
chr16	29645438	29670566	-	erp44	NM_200892	-78306
chr16	29645438	29670566	-	erp44	NM_200892	18002
chr20	25592711	25598048	+	cyp2p6	NM_200139	-69929
chr12	6057552	6066665	+	dlx4b	NM_131318	23043
chr6	6192218	6212274	-	mtif2	NM_001089324	-99668
chr12	6057552	6066665	+	dlx4b	NM_131318	72581
chr20	20973950	21089059	+	brf1b	NM_199889	98697
chr7	21418044	21451045	+	dvl2	NM_212648	-55925
chr25	17210441	17234163	+	zgc:154077	NM_001077789	96621
chr20	20973950	21089059	+	brf1b	NM_199889	-56473
chr20	20973950	21089059	+	brf1b	NM_199889	9261
chr25	17210441	17234163	+	zgc:154077	NM_001077789	-1472
chr17	37395478	37420328	+	hadhab	NM_001089437	47512
chr20	42700632	42720218	+	zgc:64076	NM_213150	85649
chr2	18274455	18292829	-	ptbp2	NM_001100007	-84709
chr19	34468858	34513184	+	fam91a1	NM_200441	-8134
chr19	34468858	34513184	+	fam91a1	NM_200441	-9899
chr4	6723927	6743447	-	lta4h	NM_213286	-31018
chr2	42215427	42229778	-	trim55a	NM_001002358	55153
chr25	22468129	22486845	-	zgc:158222	NM_001080649	7950
chr15	15091097	15095385	-	srsf1a	NM_213015	-57076
chr4	6125682	6138231	+	tmem168a	NM_001083086	47206
chr15	15091097	15095385	-	srsf1a	NM_213015	-47938
chr2	42215427	42229778	-	trim55a	NM_001002358	-42358
chr22	20513608	20559266	+	si:dkey-110c1.7	NM_001045165	9787
chr12	18468219	18491711	-	ptenb	NM_001001822	-97565
chr12	18468219	18491711	-	ptenb	NM_001001822	-82787
chr9	35245804	35271977	-	ildr2	NM_001030192	10968
chr17	12908908	12935746	-	ctage5	NM_200311	-45623
chr24	31197612	31210520	-	zgc:153980	NM_001076569	-27612
chr24	31197612	31210520	-	zgc:153980	NM_001076569	-27692
chr7	30854903	30869547	-	anxa2b	NM_001105600	54865
chr24	31197612	31210520	-	zgc:153980	NM_001076569	-36877
chr19	6002765	6004899	-	zgc:92533	NM_001003445	-77841
chr17	37395478	37420328	+	hadhab	NM_001089437	47512
chr17	37395478	37420328	+	hadhab	NM_001089437	47512
chr5	64495159	64508316	-	ncf1	NM_001030071	-50679
chr19	34354794	34447621	+	zgc:153436	NM_001044847	-10207
chr2	14949000	15018498	+	arhgap29b	NM_200111	-10906
chr6	53954333	53972073	+	zgc:136804	NM_001039997	-38009
chr3	39686314	39690840	-	b9d1	NM_001024373	7965
chr22	20431602	20444499	-	creb3l3	NM_001020673	-59322
chr4	24171822	24255475	-	taf3	NM_001042744	49331
chr6	53954333	53972073	+	zgc:136804	NM_001039997	-26957
chr7	72195885	72211302	+	zgc:64105	NM_200412	55139
chr8	30590676	30612496	+	mapk4	NM_213473	-20989
chr4	24171822	24255475	-	taf3	NM_001042744	-76174
chr5	55002228	55020246	-	rgmb	NM_001001727	77642
chr8	30590676	30612496	+	mapk4	NM_213473	14257
chr8	30590676	30612496	+	mapk4	NM_213473	-20989
chr21	25153587	25154663	-	zgc:112437	NM_001017771	-89286
chr8	30590676	30612496	+	mapk4	NM_213473	14257
chr2	18274455	18292829	-	ptbp2	NM_001100007	-84709
chr23	7765611	7783089	+	pofut1	NM_205718	8670
chr23	7765611	7783089	+	pofut1	NM_205718	-57018
chr23	7765611	7783089	+	pofut1	NM_205718	8754
chr2	18274455	18292829	-	ptbp2	NM_001100007	-84709
chr10	6929523	6938339	-	slc35e4	NM_001017857	-8026
chr6	49693926	49712066	+	npepl1	NM_001017688	-71783
chr11	1516934	1539928	+	mybl2	NM_001003867	-66032
chr9	38019603	38027186	+	inhbb	NM_131068	-79892
chr9	36925624	36927977	-	dnajc28	NM_001017648	2115
chr6	28591101	28628021	+	tp63	NM_152986	-98016
chr17	24515494	24523355	+	sepn1	NM_001004294	-54669
chr6	28591101	28628021	+	tp63	NM_152986	-42219
chr17	24515494	24523355	+	sepn1	NM_001004294	-54593
chr8	53864760	53877281	-	zgc:113115	NM_001013567	96151
chr3	25160768	25188192	-	xpnpep3	NM_207079	-82158
chr8	53864760	53877281	-	zgc:113115	NM_001013567	-20457
chr20	42700632	42720218	+	zgc:64076	NM_213150	85649
chr6	31702352	31717370	-	pgm1	NM_201025	-30671
chr6	31702352	31717370	-	pgm1	NM_201025	-30789
chr20	25581663	25588020	+	cyp2v2	NM_001009890	-80977
chr14	26948447	26966363	-	sparc	NM_001001942	-805
chr8	53864760	53877281	-	zgc:113115	NM_001013567	96151
chr18	39060127	39099266	-	vasp	NM_001017790	11769
chr21	10269249	10279837	-	ube2r2	NM_001002600	66622
chr8	53864760	53877281	-	zgc:113115	NM_001013567	-20457
chr21	10269249	10279837	-	ube2r2	NM_001002600	-76335
chr7	52366138	52369706	-	ankrd46	NM_205596	-79368
chr22	38065108	38079706	-	pfn2	NM_201336	-94506
chr17	25267800	25281675	+	srrm1	NM_213442	4481
chr22	38065108	38079706	-	pfn2	NM_201336	-94506
chr8	690342	699975	+	zgc:110697	NM_001017864	23307
chr8	690342	699975	+	zgc:110697	NM_001017864	-58236
chr3	36284158	36305521	+	wipi1	NM_200391	-12647
chr16	19364158	19407077	-	zgc:171680	NM_001109824	-27795
chr16	19364158	19407077	-	zgc:171680	NM_001109824	-26713
chr16	19364158	19407077	-	zgc:171680	NM_001109824	-26933
chr16	30830234	30855803	+	crot	NM_001018151	-44769
chr2	29831317	29850278	-	trpa1a	NM_001007065	39376
chr2	29831317	29850278	-	trpa1a	NM_001007065	39457
chr8	24680513	24713658	+	mapk14a	NM_131722	-99320
chr1	28142181	28159022	+	zgc:56306	NM_200315	-64251
chr1	28142181	28159022	+	zgc:56306	NM_200315	62150
chr1	28142181	28159022	+	zgc:56306	NM_200315	62970
chr20	25581732	25587756	+	cyp2v1	NM_001001835	-80908
chr20	51466643	51521235	-	rbm25	NM_199790	-68297
chr16	5171264	5179096	+	zgc:162301	NM_001083867	31750
chr1	35498196	35543978	+	hhip	NM_001080012	52043
chr13	33264036	33278419	-	vti1b	NM_201036	9718
chr22	2861534	2868822	+	si:dkey-1b17.7	NM_001110115	-99505
chr21	195000	196837	+	zgc:110385	NM_001033098	20411
chr21	195000	196837	+	zgc:110385	NM_001033098	84216
chr9	23710847	23781359	+	itgb5	NM_001082836	30325
chr19	19066075	19123284	+	hibadha	NM_001003646	-88449
chr8	24680513	24713658	+	mapk14a	NM_131722	-99320
chr19	19066075	19123284	+	hibadha	NM_001003646	39354
chr19	19066075	19123284	+	hibadha	NM_001003646	-88357
chr16	34323677	34328383	-	zgc:92763	NM_001002560	-62646
chr4	19416088	19421198	-	napepld	NM_001080613	83858
chr21	195000	196837	+	zgc:110385	NM_001033098	-62132
chr19	26140025	26163657	-	asns	NM_201163	-7124
chr19	26140025	26163657	-	asns	NM_201163	77198
chr20	20888906	20893918	-	ckbb	NM_173222	18665
chr20	20888906	20893918	-	ckbb	NM_173222	-70771
chr11	26419332	26436049	+	gnl3l	NM_001002875	73142
chr16	19364158	19407077	-	zgc:171680	NM_001109824	-26933
chr20	30948502	30957047	-	acat2	NM_131370	5029
chr16	19364158	19407077	-	zgc:171680	NM_001109824	-27795
chr19	31674295	31693035	-	abcf1	NM_213186	68250
chr11	27619539	27635169	-	zgc:136367	NM_001045307	-57201
chr14	169035	170923	+	msxe	NM_131273	73766
chr19	31674295	31693035	-	abcf1	NM_213186	43819
chr16	19364158	19407077	-	zgc:171680	NM_001109824	-26713
chr11	27619539	27635169	-	zgc:136367	NM_001045307	-49421
chr9	24841954	24845978	+	dhrs12	NM_001076557	13475
chr21	21352832	21374749	+	lmbrd2b	NM_199944	-11313
chr7	60125196	60140343	+	rpl34	NM_201122	42064
chr7	60125196	60140343	+	rpl34	NM_201122	51655
chr21	21352832	21374749	+	lmbrd2b	NM_199944	4145
chr16	56452411	56493086	-	brd9	NM_200275	-73351
chr20	30948502	30957047	-	acat2	NM_131370	5029
chr19	3700048	3730244	-	stm	NM_198817	18493
chr6	52471852	52518199	-	zgc:153206	NM_001076755	18281
chr5	62950728	62964793	+	alad	NM_001017645	67145
chr7	60153094	60195709	+	zgc:101657	NM_001006086	79553
chr7	60153094	60195709	+	zgc:101657	NM_001006086	69962
chr23	32200961	32206133	-	ormdl2	NM_001040048	21407
chr23	36504790	36533883	+	lima1	NM_131664	-93862
chr17	24515494	24523355	+	sepn1	NM_001004294	-54669
chr23	36504790	36533883	+	lima1	NM_131664	19099
chr19	33864059	33869330	-	zgc:101116	NM_001003559	-35937
chr19	33864059	33869330	-	zgc:101116	NM_001003559	-62366
chr17	24515494	24523355	+	sepn1	NM_001004294	-54593
chr21	28751626	28763687	+	ttc1	NM_001007382	-62807
chr21	28751626	28763687	+	ttc1	NM_001007382	-19928
chr20	30948502	30957047	-	acat2	NM_131370	5029
chr20	33614332	33729361	-	rock2b	NM_001093747	-47140
chr2	20763778	20771677	+	arpc5a	NM_194378	82548
chr2	20763778	20771677	+	arpc5a	NM_194378	82640
chr14	143316	146876	-	zgc:110421	NM_001029973	89259
chr2	16369139	16386187	-	atp1b3a	NM_131221	-65682
chr5	52913056	52926770	+	si:dkey-1o2.1	NM_001110283	82821
chr9	35217688	35231495	-	me3	NM_001089356	91209
chr14	143316	146876	-	zgc:110421	NM_001029973	51607
chr10	20608631	20618205	-	ppapdc1b	NM_001002211	48943
chr21	26592104	26595874	-	zgc:77262	NM_205654	-91789
chr2	16369139	16386187	-	atp1b3a	NM_131221	-65682
chr9	35217688	35231495	-	me3	NM_001089356	-29514
chr25	27744408	27759694	-	dldh	NM_201506	-74963
chr22	20487687	20496746	+	hmg20b	NM_001020551	-16134
chr8	17915328	18035846	-	skia	NM_130935	-49296
chr20	27401392	27411249	-	serpina10a	NM_001045071	32582
chr12	14451028	14495828	+	rnasen	NM_001110472	30328
chr21	23809399	23813162	-	sc5dl	NM_001004630	25170
chr17	21125146	21141428	+	zgc:153973	NM_001077547	-70830
chr8	17915328	18035846	-	skia	NM_130935	72933
chr14	48282188	48286644	-	zgc:153018	NM_001076639	-73468
chr25	654473	829991	+	zgc:162740	NM_001098393	-3771
chr5	62750305	62762171	+	tmem19	NM_001002098	75823
chr25	654473	829991	+	zgc:162740	NM_001098393	-93065
chr5	62750305	62762171	+	tmem19	NM_001002098	75723
chr25	654473	829991	+	zgc:162740	NM_001098393	-3645
chr24	21731292	21740059	-	zdhhc23	NM_001003757	87594
chr5	62750305	62762171	+	tmem19	NM_001002098	-61748
chr5	62750305	62762171	+	tmem19	NM_001002098	-14473
chr24	21731292	21740059	-	zdhhc23	NM_001003757	-8339
chr10	16254383	16292900	+	slc12a2	NM_001002080	67948
chr16	38154223	38165789	+	decr1	NM_001002444	-15983
chr20	32444936	32471752	+	snx3	NM_001037106	-30999
chr20	32444936	32471752	+	snx3	NM_001037106	-75457
chr24	28114876	28126589	-	zmynd11	NM_001044326	98541
chr15	40792146	40811051	-	farsb	NM_001007768	-98303
chr3	42959732	43030430	+	axin1	NM_131503	-71530
chr14	32348885	32359251	-	cab39l1	NM_213501	2066
chr9	38419297	38505435	+	dirc2	NM_001004597	-95930
chr23	36504790	36533883	+	lima1	NM_131664	19099
chr16	28631244	28631590	-	zgc:158741	NM_001080636	-5572
chr1	25706787	25748582	-	sh3gl2	NM_201116	34419
chr23	36504790	36533883	+	lima1	NM_131664	-93862
chr25	27744408	27759694	-	dldh	NM_201506	-74963
chr20	32444936	32471752	+	snx3	NM_001037106	19155
chr24	27868282	27889792	+	zgc:153918	NM_001077562	-50017
chr9	38419297	38505435	+	dirc2	NM_001004597	74719
chr19	26140025	26163657	-	asns	NM_201163	77198
chr19	26140025	26163657	-	asns	NM_201163	-7124
chr15	11905750	11907555	+	fkrp	NM_001042689	98953
chr3	19070928	19103145	+	smarca4	NM_181603	-61209
chr19	19066075	19123284	+	hibadha	NM_001003646	-88449
chr22	27479831	27487284	-	si:dkey-44g23.7	NM_001103139	-6493
chr15	40792146	40811051	-	farsb	NM_001007768	-98303
chr19	19066075	19123284	+	hibadha	NM_001003646	-88357
chr7	50245213	50262169	-	mfge8a	NM_001044776	-81216
chr19	19066075	19123284	+	hibadha	NM_001003646	39354
chr8	53210554	53219001	+	zgc:64161	NM_213126	-58658
chr22	27479831	27487284	-	si:dkey-44g23.7	NM_001103139	-9873
chr13	33906347	33908388	-	cst3	NM_001031673	-98027
chr16	28631244	28631590	-	zgc:158741	NM_001080636	-5572
chr23	29797482	29812719	-	nmnat1	NM_001017629	-37582
chr21	24514040	24524773	+	tmem45b	NM_205677	-33225
chr21	24514040	24524773	+	tmem45b	NM_205677	63392
chr13	33906347	33908388	-	cst3	NM_001031673	-97916
chr5	68434208	68438630	+	zgc:101858	NM_001005597	12101
chr21	24514040	24524773	+	tmem45b	NM_205677	-54720
chr16	58695281	58709975	-	eomesb	NM_001083575	70467
chr16	58695281	58709975	-	eomesb	NM_001083575	70354
chr13	33906347	33908388	-	cst3	NM_001031673	-72632
chr2	21152499	21177521	+	ctdsplb	NM_001076615	36058
chr23	44760941	44770061	+	zgc:85858	NM_212943	61816
chr13	54056692	54061639	+	vent	NM_131700	79533
chr8	24018691	24032768	+	dnajc5aa	NM_001002464	-88193
chr7	44070322	44078201	+	zgc:55634	NM_200169	60992
chr11	25363481	25392337	-	mxra8a	NM_001080582	-13681
chr9	35909619	35916853	-	rp42-pen	NM_205538	-26060
chr19	27802131	27819995	-	gtf2h4	NM_199927	34656
chr15	1529850	1568335	+	smc4	NM_173253	40071
chr9	35909619	35916853	-	rp42-pen	NM_205538	39687
chr23	24205303	24282728	+	ptpn11b	NM_200454	49846
chr8	41720576	41745001	+	zgc:56538	NM_200326	-66571
chr14	25277278	25279514	+	zgc:77366	NM_212645	-38887
chr11	1498368	1511287	+	ift52	NM_001001834	91686
chr22	38065108	38079706	-	pfn2	NM_201336	-94506
chr11	1498368	1511287	+	ift52	NM_001001834	-84598
chr15	1529850	1568335	+	smc4	NM_173253	87060
chr6	36788141	36792397	+	zgc:110788	NM_001013288	21133
chr1	407554	466025	+	mrpl39	NM_199915	-28146
chr11	20150117	20195517	-	zgc:55764	NM_212668	-50614
chr1	5053615	5074378	+	fam134a	NM_001080014	62293
chr25	21316669	21337866	-	edc3	NM_001018126	40938
chr21	26592104	26595874	-	zgc:77262	NM_205654	-91789
chr11	25662904	25690375	+	zgc:153953	NM_001080005	25380
chr14	25277278	25279514	+	zgc:77366	NM_212645	-39008
chr13	31911579	31931472	+	slc38a6	NM_001020472	-55977
chr7	44070322	44078201	+	zgc:55634	NM_200169	61080
chr1	407554	466025	+	mrpl39	NM_199915	-4355
chr1	407554	466025	+	mrpl39	NM_199915	53087
chr5	25276559	25288849	-	mtmr2	NM_131371	-25828
chr7	44070322	44078201	+	zgc:55634	NM_200169	3502
chr7	44070322	44078201	+	zgc:55634	NM_200169	6541
chr23	24205303	24282728	+	ptpn11b	NM_200454	-52232
chr9	35217688	35231495	-	me3	NM_001089356	-29514
chr7	44070322	44078201	+	zgc:55634	NM_200169	6705
chr6	26770821	26796913	+	boka	NM_001003612	-68873
chr8	24018691	24032768	+	dnajc5aa	NM_001002464	-88055
chr1	604200	609330	+	rpl24	NM_173235	43170
chr19	27802131	27819995	-	gtf2h4	NM_199927	42592
chr9	35217688	35231495	-	me3	NM_001089356	91209
chr14	32363152	32377619	+	phf6	NM_199765	5967
chr20	34445230	34478167	-	zgc:101095	NM_001004644	-25121
chr13	33527810	33538357	+	dcdc2b	NM_001037689	-10222
chr17	24515494	24523355	+	sepn1	NM_001004294	-54593
chr17	24515494	24523355	+	sepn1	NM_001004294	-54669
chr20	34445230	34478167	-	zgc:101095	NM_001004644	-25280
chr13	33492274	33504912	+	tmem39b	NM_199860	-45758
chr22	2861534	2868822	+	si:dkey-1b17.7	NM_001110115	-99505
chr6	36788141	36792397	+	zgc:110788	NM_001013288	21133
chr7	69505147	69517000	+	gcshb	NM_001002579	-7746
chr2	10612458	10649203	+	glmna	NM_001007415	96460
chr23	42937980	42980371	-	cyp2aa7	NM_001109722	-17487
chr23	42937980	42980371	-	cyp2aa7	NM_001109722	-17326
chr2	20662890	20675834	+	zgc:63674	NM_200616	-18340
chr13	6258328	6278651	+	zgc:154071	NM_001076745	77935
chr12	30373989	30383304	+	cdkrap3	NM_001002105	53135
chr16	29444176	29452313	-	alg2	NM_001104936	6810
chr16	29444176	29452313	-	alg2	NM_001104936	-86917
chr11	35427991	35474621	-	mapkapk3	NM_001080079	-74362
chr20	32444936	32471752	+	snx3	NM_001037106	-30999
chr16	31637084	31645223	+	rrnad1	NM_001089434	-81214
chr20	32444936	32471752	+	snx3	NM_001037106	19155
chr20	32444936	32471752	+	snx3	NM_001037106	-75457
chr11	35427991	35474621	-	mapkapk3	NM_001080079	-74487
chr5	62966076	62989888	+	fbxw5	NM_213319	82493
chr10	16254383	16292900	+	slc12a2	NM_001002080	67948
chr16	29444176	29452313	-	alg2	NM_001104936	34374
chr2	20662890	20675834	+	zgc:63674	NM_200616	-18248
chr4	24694250	24707866	+	si:dkeyp-89c11.2	NM_001030110	-97325
chr10	102543	107650	+	minal	NM_200337	40268
chr18	6208513	6222978	-	cd9a	NM_212619	63364
chr4	24694250	24707866	+	si:dkeyp-89c11.2	NM_001030110	-7467
chr23	2894246	2901300	-	c20orf24	NM_199850	-57716
chr15	13987348	13991836	+	zgc:162193	NM_001089327	70393
chr7	41056950	41068089	+	zgc:158564	NM_001099238	-73277
chr1	21428977	21439185	+	anxa5b	NM_181757	71593
chr3	50585959	50608063	-	zgc:153652	NM_001077292	49504
chr22	1526706	1801223	+	zgc:175284	NM_001113614	-5160
chr14	48982809	49005825	-	elf2a	NM_001004116	73740
chr18	20248867	20260042	+	ddb2	NM_001083061	85616
chr14	48982809	49005825	-	elf2a	NM_001004116	71109
chr23	24980872	24986739	-	sdf4	NM_213087	43705
chr11	7323093	7352092	-	zgc:92139	NM_001002355	60396
chr18	20248867	20260042	+	ddb2	NM_001083061	80581
chr18	30386017	30421364	+	si:dkey-265o13.4	NM_001080807	90783
chr18	30386017	30421364	+	si:dkey-265o13.4	NM_001080807	58909
chr18	20248867	20260042	+	ddb2	NM_001083061	-27697
chr3	22548103	22554165	+	zgc:103564	NM_001007333	11368
chr5	32159265	32173443	+	hmbsa	NM_201154	50743
chr23	24980872	24986739	-	sdf4	NM_213087	43593
chr22	18380086	18384370	+	zgc:136330	NM_001045327	27099
chr3	22548103	22554165	+	zgc:103564	NM_001007333	11254
chr6	18658748	18665371	+	mif4gda	NM_200384	-86974
chr20	20973950	21089059	+	brf1b	NM_199889	9261
chr19	16814709	16822353	-	clic1	NM_212682	-3946
chr11	23927407	24015339	-	atp2b4	NM_001077467	-47038
chr20	31243498	31257030	+	pdip5	NM_197933	-63086
chr20	20973950	21089059	+	brf1b	NM_199889	-56473
chr11	1498368	1511287	+	ift52	NM_001001834	-84598
chr15	28441620	28463543	-	zgc:162698	NM_001089384	-12444
chr5	26179553	26186635	-	tia1l	NM_200182	-12534
chr5	1413492	1429219	-	zgc:73070	NM_213037	58095
chr5	26179553	26186635	-	tia1l	NM_200182	-12444
chr5	1413492	1429219	-	zgc:73070	NM_213037	80973
chr5	1413492	1429219	-	zgc:73070	NM_213037	80895
chr10	45653027	45661767	+	denr	NM_001002697	37909
chr11	1516934	1539928	+	mybl2	NM_001003867	-66032
chr1	45269841	45278545	+	ndufs8a	NM_213139	-99477
chr13	28488435	28489495	-	si:busm1-265n4.4	NM_001030184	-45799
chr5	44625003	44630396	+	aqp3a	NM_213468	2597
chr19	31655530	31666000	-	ppp1r10	NM_212568	16784
chr19	12607697	12640572	+	spag1	NM_001089406	-84890
chr19	31655530	31666000	-	ppp1r10	NM_212568	41215
chr1	45269841	45278545	+	ndufs8a	NM_213139	71091
chr21	574701	602259	+	rad23b	NM_200564	-63188
chr3	61357121	61391117	+	tsen54	NM_001020529	32416
chr7	58874320	58882720	-	mad2l1	NM_001017739	-51159
chr4	2798279	2816337	-	aebp2	NM_213494	-96400
chr1	45269841	45278545	+	ndufs8a	NM_213139	9032
chr14	37446604	37450155	+	pitx2	NM_130975	15593
chr16	48757483	48798268	+	smg5	NM_001024923	-53532
chr13	28488435	28489495	-	si:busm1-265n4.4	NM_001030184	-45799
chr3	40815403	40832105	-	wipi2	NM_001002729	11363
chr17	43897072	43910257	-	ahsa1l	NM_212602	-66998
chr19	49493932	49503794	-	cdca8	NM_001007456	15251
chr24	37772675	37798084	-	coasy	NM_001004577	-6384
chr5	1413492	1429219	-	zgc:73070	NM_213037	80895
chr9	25154450	25157126	+	zgc:123096	NM_001037226	-90950
chr19	597963	605857	+	zgc:77724	NM_213210	-60681
chr13	35694394	35703435	+	mkks	NM_200165	23198
chr20	35098588	35100985	-	lft1	NM_130960	-29769
chr14	31427033	31489979	+	mrpl11	NM_001002556	-35305
chr14	31427033	31489979	+	mrpl11	NM_001002556	-35230
chr10	34411269	34420294	+	zgc:64133	NM_213131	30802
chr16	48757483	48798268	+	smg5	NM_001024923	-53532
chr24	25616583	25638117	-	nupl1	NM_213229	83555
chr11	416540	425059	-	nuf2	NM_200310	92267
chr2	19218054	19234798	+	cdc20	NM_213080	-96257
chr8	26671565	26699131	-	efhd2	NM_001045211	65682
chr10	26328825	26333859	-	sod1	NM_131294	-94365
chr24	20068002	20136956	+	sulf1	NM_001003846	-6238
chr10	25156454	25190735	-	ilk	NM_200571	-33695
chr5	1413492	1429219	-	zgc:73070	NM_213037	58095
chr10	25156454	25190735	-	ilk	NM_200571	-33800
chr5	1413492	1429219	-	zgc:73070	NM_213037	80973
chr2	1970703	1975843	+	hig1	NM_200100	-62222
chr3	14689987	14736030	-	xpo6	NM_194374	61111
chr25	36976594	36993224	+	lsm14aa	NM_200425	-87807
chr6	49853178	49871986	+	zgc:56112	NM_200195	87469
chr16	41908817	41912597	+	zgc:77056	NM_212698	-5616
chr10	34411269	34420294	+	zgc:64133	NM_213131	-54319
chr11	416540	425059	-	nuf2	NM_200310	15552
chr20	26969463	26975855	+	zgc:92217	NM_001008580	76704
chr10	34411269	34420294	+	zgc:64133	NM_213131	17244
chr2	49569955	49594175	-	cdc34b	NM_001002688	86110
chr10	25156454	25190735	-	ilk	NM_200571	-14430
chr19	45040523	45059977	-	zgc:56010	NM_201081	19104
chr14	31427033	31489979	+	mrpl11	NM_001002556	-6597
chr10	26328825	26333859	-	sod1	NM_131294	84534
chr18	12712891	12722826	+	si:ch211-260p9.6	NM_001044965	-31000
chr24	21535653	21543116	+	zgc:162943	NM_001089343	-84485
chr7	41952813	41971406	-	dnajb6b	NM_200305	93154
chr5	24635186	24651964	-	zgc:110800	NM_001014351	99754
chr22	12272619	12286832	+	ccnt2b	NM_212586	12330
chr10	25963451	25979338	-	cct8	NM_201062	-48747
chr24	6018857	6094242	+	abi1a	NM_200738	46174
chr14	22239938	22243512	+	zgc:114040	NM_001025535	21253
chr10	25963451	25979338	-	cct8	NM_201062	73524
chr10	45653027	45661767	+	denr	NM_001002697	37909
chr14	2664	7583	+	aurkb	NM_212566	-54953
chr8	12635628	12639756	+	zgc:110020	NM_001024214	-23949
chr7	41476367	41484740	+	zgc:112356	NM_001030239	-94619
chr7	41476367	41484740	+	zgc:112356	NM_001030239	-94505
chr7	41952813	41971406	-	dnajb6b	NM_200305	-50345
chr17	23141212	23143709	+	ppp1r3ca	NM_001002376	40115
chr14	37446604	37450155	+	pitx2	NM_130975	15593
chr15	19614329	19692939	-	tpst1	NM_131403	-18982
chr20	15558607	15560464	+	jun	NM_199987	80156
chr22	17414740	17423367	+	si:dkey-171o17.2	NM_001017907	-76813
chr19	4660591	4674161	-	thrap3b	NM_214815	12003
chr14	2664	7583	+	aurkb	NM_212566	-92605
chr21	21298990	21309858	-	skp2	NM_001082837	65310
chr21	21298990	21309858	-	skp2	NM_001082837	-54287
chr21	10258909	10264101	+	nudt2	NM_001002323	45694
chr25	24278957	24306472	-	nap1l4a	NM_001089347	-10873
chr18	16374993	16385374	+	eif4g2b	NM_001013443	40585
chr22	512884	522917	-	ccnd3	NM_001006017	-43383
chr14	27461837	27474814	-	syvn1	NM_212735	36897
chr2	9361510	9370252	+	zgc:110680	NM_001020824	-71999
chr20	25669076	25674757	-	si:dkeyp-117h8.4	NM_001082878	12117
chr22	10757077	10768665	+	rassf1	NM_001004550	31626
chr3	14689987	14736030	-	xpo6	NM_194374	61111
chr25	22468129	22486845	-	zgc:158222	NM_001080649	7950
chr21	21993815	22003343	+	pcf11	NM_001007307	20146
chr22	10757077	10768665	+	rassf1	NM_001004550	-41168
chr21	10258909	10264101	+	nudt2	NM_001002323	-97263
chr21	21298990	21309858	-	skp2	NM_001082837	-38829
chr22	10757077	10768665	+	rassf1	NM_001004550	31697
chr6	52290455	52299448	-	eif6	NM_200944	18714
chr6	47787101	47806447	+	zgc:66317	NM_200112	67932
chr6	47787101	47806447	+	zgc:66317	NM_200112	67845
chr21	21993815	22003343	+	pcf11	NM_001007307	2282
chr4	2798279	2816337	-	aebp2	NM_213494	-96400
chr18	16374993	16385374	+	eif4g2b	NM_001013443	84733
chr18	16374993	16385374	+	eif4g2b	NM_001013443	40786
chr22	512884	522917	-	ccnd3	NM_001006017	58335
chr22	10757077	10768665	+	rassf1	NM_001004550	-41015
chr22	512884	522917	-	ccnd3	NM_001006017	-30186
chr19	597963	605857	+	zgc:77724	NM_213210	-60681
chr17	10511331	10526983	-	srp54	NM_200988	37492
chr1	46040754	46055100	-	atf7ip	NM_001077603	13626
chr9	11873731	11931228	-	itgav	NM_001033721	-46767
chr17	34973068	34975295	+	id2a	NM_201291	59264
chr11	13827695	13974969	+	wdr18	NM_001005206	-39251
chr3	19552579	19570041	+	mettl2a	NM_001017902	-68993
chr10	25963451	25979338	-	cct8	NM_201062	-48747
chr19	32988502	33011013	-	LOC566469	NM_001100022	-59509
chr8	20954129	20964670	+	mobkl2a	NM_199716	17185
chr9	30669929	30676936	-	zgc:66415	NM_200526	-74539
chr8	20954129	20964670	+	mobkl2a	NM_199716	38878
chr19	44607348	44619290	+	snrnp40	NM_200322	47012
chr3	36331696	36364021	-	gna13b	NM_001013263	67216
chr18	4449571	4465992	+	zdhhc7	NM_001002602	17777
chr8	20954129	20964670	+	mobkl2a	NM_199716	14339
chr8	20954129	20964670	+	mobkl2a	NM_199716	39001
chr8	20954129	20964670	+	mobkl2a	NM_199716	-44277
chr4	2419793	2508699	-	cog5	NM_001045144	53816
chr4	17921645	18007522	-	rap1b	NM_199533	-85016
chr24	9088143	9094648	-	tgif1	NM_199567	-51855
chr9	30669929	30676936	-	zgc:66415	NM_200526	83613
chr9	30669929	30676936	-	zgc:66415	NM_200526	45122
chr21	36930712	36935753	-	ripply1	NM_001039108	14538
chr12	37683213	37704261	+	nploc4	NM_199807	-48613
chr4	17921645	18007522	-	rap1b	NM_199533	55913
chr16	41851627	41861778	-	ebag9	NM_201094	-52655
chr2	43717976	43737246	+	zgc:158364	NM_001089409	-39763
chr12	37683213	37704261	+	nploc4	NM_199807	51101
chr8	20954129	20964670	+	mobkl2a	NM_199716	38781
chr8	20954129	20964670	+	mobkl2a	NM_199716	17056
chr18	6942058	6944417	-	si:dkey-238c7.16	NM_001044882	85185
chr19	32988502	33011013	-	LOC566469	NM_001100022	-59608
chr19	32988502	33011013	-	LOC566469	NM_001100022	-46240
chr4	17921645	18007522	-	rap1b	NM_199533	-48620
chr24	9088143	9094648	-	tgif1	NM_199567	-14525
chr24	21938644	21952043	-	spice1	NM_001008636	47152
chr4	2798279	2816337	-	aebp2	NM_213494	-96400
chr11	2742075	2805470	+	srpk1b	NM_001080669	-32738
chr21	29246062	29281472	+	slc7a3	NM_001007329	60104
chr18	11725119	11776002	-	fam107b	NM_198372	40303
chr3	36331696	36364021	-	gna13b	NM_001013263	-22294
chr24	9088143	9094648	-	tgif1	NM_199567	-14729
chr1	46040754	46055100	-	atf7ip	NM_001077603	42061
chr21	29246062	29281472	+	slc7a3	NM_001007329	-2846
chr8	26561009	26569017	-	zgc:66430	NM_200055	-64432
chr17	27113088	27114979	-	id3	NM_152967	-79295
chr4	2419793	2508699	-	cog5	NM_001045144	-22086
chr4	2419793	2508699	-	cog5	NM_001045144	83996
chr18	4449571	4465992	+	zdhhc7	NM_001002602	17777
chr11	25692667	25716417	+	rnpep	NM_001002741	55143
chr19	44607348	44619290	+	snrnp40	NM_200322	47146
chr3	108144	125597	-	tufm	NM_001013505	-51338
chr10	25963451	25979338	-	cct8	NM_201062	73524
chr11	12842890	12860009	-	txlng	NM_001044311	-24370
chr11	12842890	12860009	-	txlng	NM_001044311	-66966
chr19	597963	605857	+	zgc:77724	NM_213210	-60681
chr12	1189611	1196817	-	zgc:153060	NM_001077342	-82716
chr12	1189611	1196817	-	zgc:153060	NM_001077342	-82610
chr19	30391001	30401387	-	sh3bgrl3	NM_200278	-74990
chr24	27271786	27276437	-	rpl22l1	NM_001045335	11536
chr24	27271786	27276437	-	rpl22l1	NM_001045335	11643
chr20	10686071	10707207	+	zgc:100997	NM_001003605	-98932
chr17	10511331	10526983	-	srp54	NM_200988	37492
chr24	27271786	27276437	-	rpl22l1	NM_001045335	-97168
chr24	27289867	27428798	-	tnikb	NM_001037676	55193
chr24	20068002	20136956	+	sulf1	NM_001003846	-6238
chr22	25538579	25551175	-	csrp2bp	NM_001002699	-66151
chr1	18280193	18303693	+	smc2	NM_199542	69584
chr19	28344530	28388172	+	nsun2	NM_199711	13277
chr8	53222228	53231318	+	zgc:56596	NM_200300	-46984
chr22	25538579	25551175	-	csrp2bp	NM_001002699	-67407
chr19	28344530	28388172	+	nsun2	NM_199711	-47773
chr11	26406335	26408962	+	opn1sw2	NM_131192	60145
chr22	25538579	25551175	-	csrp2bp	NM_001002699	-67708
chr6	52290455	52299448	-	eif6	NM_200944	18714
chr24	27271786	27276437	-	rpl22l1	NM_001045335	-97168
chr1	388739	392777	+	zgc:123253	NM_001037123	-46961
chr2	10398985	10423692	-	mtf2	NM_001045264	-92306
chr8	23946097	23956486	+	zgc:100920	NM_001003635	95251
chr12	34979365	35032034	+	slc9a3r1	NM_212707	-44060
chr21	5262341	5305753	-	zgc:77838	NM_205680	92755
chr2	10398985	10423692	-	mtf2	NM_001045264	99966
chr10	17745084	17758385	+	slc20a1b	NM_212588	12778
chr23	10503115	10555684	+	eif4ba	NM_001099237	-24743
chr23	30121593	30125856	+	aurkaip1	NM_001105695	98475
chr18	27253772	27260921	-	zgc:56106	NM_200194	61796
chr1	38578880	38580993	-	hmgb2a	NM_001037424	-32928
chr3	40180169	40197379	-	znf598	NM_001033718	64431
chr8	41748563	41750788	+	si:ch211-170d8.2	NM_001113624	-38584
chr8	21767735	21788333	+	cry2a	NM_131791	-98342
chr2	8433647	8444890	+	fubp1	NM_213144	18805
chr10	1983896	1990083	-	oep	NM_131092	-94659
chr4	2119923	2126251	-	krr1	NM_001045325	-10923
chr8	21767735	21788333	+	cry2a	NM_131791	89544
chr19	12744069	12767856	-	pabpc1b	NM_200882	75269
chr8	21767735	21788333	+	cry2a	NM_131791	89443
chr1	388739	392777	+	zgc:123253	NM_001037123	-23170
chr1	388739	392777	+	zgc:123253	NM_001037123	85026
chr21	26801886	26807664	-	zgc:110527	NM_001012501	16932
chr8	21767735	21788333	+	cry2a	NM_131791	46561
chr14	22239938	22243512	+	zgc:114040	NM_001025535	21253
chr10	17745084	17758385	+	slc20a1b	NM_212588	-64673
chr8	53851433	53857038	-	LOC100000333	NM_001113640	-40700
chr1	388739	392777	+	zgc:123253	NM_001037123	34272
chr24	27271786	27276437	-	rpl22l1	NM_001045335	11643
chr4	2119923	2126251	-	krr1	NM_001045325	80485
chr8	53851433	53857038	-	LOC100000333	NM_001113640	75908
chr24	27271786	27276437	-	rpl22l1	NM_001045335	11536
chr5	34905574	34909617	+	med22	NM_001002144	-70441
chr2	8433647	8444890	+	fubp1	NM_213144	18805
chr13	23016678	23047428	-	rufy2	NM_001105681	-24601
chr13	36305927	36309610	-	mycl1a	NM_212937	-62256
chr18	34402840	34405923	-	exosc5	NM_001083071	75771
chr1	41582557	41668886	-	rgs12	NM_214724	30075
chr10	25947495	25962698	-	tmem135	NM_001089418	56884
chr18	44148411	44175922	-	cstf3	NM_213053	70541
chr3	40180169	40197379	-	znf598	NM_001033718	64431
chr21	36996646	37074209	+	si:ch211-208m1.2	NM_001080003	75431
chr16	41003888	41012327	+	gabpb2b	NM_001077152	-10478
chr15	13530572	13555027	-	sars2	NM_201179	-43559
chr10	25947495	25962698	-	tmem135	NM_001089418	-65387
chr12	4305817	4312084	-	zgc:162560	NM_001089362	7515
chr1	41582557	41668886	-	rgs12	NM_214724	29936
chr20	23724672	23819066	+	si:dkey-15j16.4	NM_001045487	30080
chr13	36305927	36309610	-	mycl1a	NM_212937	27771
chr8	9472729	9478902	+	pim1	NM_131539	-62106
chr2	19237375	19288178	-	elovl1a	NM_001005989	-26133
chr12	5744606	5755293	-	cep55l	NM_001020762	-7892
chr6	29827581	29836350	+	lrrc40	NM_199862	-43388
chr19	2307833	2314604	-	twistnb	NM_001007153	-72404
chr18	1091674	1197989	-	pepd	NM_198912	96328
chr25	36976594	36993224	+	lsm14aa	NM_200425	-87807
chr4	8715658	8729616	-	dmtf1	NM_001002665	-88989
chr7	21216452	21260928	-	zgc:153917	NM_001080579	79543
chr9	35120017	35133682	+	gpr161	NM_001007199	-20269
chr12	23669379	23711071	-	nsfb	NM_001024454	-7885
chr19	4660591	4674161	-	thrap3b	NM_214815	12003
chr9	35120017	35133682	+	gpr161	NM_001007199	24996
chr9	35120017	35133682	+	gpr161	NM_001007199	40538
chr4	11308221	11350591	-	zgc:63566	NM_201169	55999
chr16	40867007	40904070	+	zgc:64042	NM_200636	95576
chr7	21216452	21260928	-	zgc:153917	NM_001080579	19727
chr10	16755265	16757243	+	zgc:63505	NM_201031	-49558
chr23	36476430	36493157	-	csad	NM_001007348	7466
chr10	1983896	1990083	-	oep	NM_131092	-94659
chr10	16755265	16757243	+	zgc:63505	NM_201031	-85202
chr10	16755265	16757243	+	zgc:63505	NM_201031	-2307
chr12	20284869	20286441	+	cby1	NM_001003838	79085
chr21	25174026	25176022	+	zgc:136892	NM_001040360	-69923
chr5	50768649	50778746	-	arrdc3a	NM_001080029	-25122
chr10	16755265	16757243	+	zgc:63505	NM_201031	-22150
chr3	39233641	39254448	-	nmt1a	NM_001020480	32471
chr3	39233641	39254448	-	nmt1a	NM_001020480	45995
chr16	27556253	27577115	+	dync1i1	NM_001079990	68440
chr13	13791398	13803591	+	rpia	NM_001007289	-89738
chr20	54774861	54808925	-	evlb	NM_205633	97111
chr2	49601522	49626274	+	zgc:162293	NM_001089323	93457
chr19	9235374	9270104	+	si:dkeyp-39e9.2	NM_001045100	-13396
chr5	21899104	21906330	-	zgc:92599	NM_001004607	-45386
chr21	22075720	22132257	-	rb1	NM_001077780	21789
chr3	39233641	39254448	-	nmt1a	NM_001020480	45995
chr21	22075720	22132257	-	rb1	NM_001077780	-89450
chr2	10398985	10423692	-	mtf2	NM_001045264	-92306
chr5	21899104	21906330	-	zgc:92599	NM_001004607	-40078
chr13	25773313	25790198	+	sec23ip	NM_001077379	17329
chr5	21899104	21906330	-	zgc:92599	NM_001004607	-45232
chr4	2119923	2126251	-	krr1	NM_001045325	-10923
chr13	25773313	25790198	+	sec23ip	NM_001077379	17329
chr5	21899104	21906330	-	zgc:92599	NM_001004607	-45115
chr2	10398985	10423692	-	mtf2	NM_001045264	99966
chr10	8368914	8386382	+	zgc:114200	NM_001030129	10752
chr16	27556253	27577115	+	dync1i1	NM_001079990	68440
chr18	6942058	6944417	-	si:dkey-238c7.16	NM_001044882	85185
chr4	20426021	20519666	-	ppp1r12a	NM_001003870	-41236
chr24	37889525	37896283	+	arf1l	NM_201480	85057
chr4	20426021	20519666	-	ppp1r12a	NM_001003870	-35497
chr18	12725631	12770318	+	plcg2	NM_001044968	-18260
chr4	2119923	2126251	-	krr1	NM_001045325	80485
chr19	9397592	9435373	-	lass2	NM_153671	87563
chr3	39233641	39254448	-	nmt1a	NM_001020480	32471
chr5	21899104	21906330	-	zgc:92599	NM_001004607	-45115
chr5	22927596	22955527	+	cds2	NM_201186	61416
chr5	21899104	21906330	-	zgc:92599	NM_001004607	-40078
chr4	9668647	9679879	+	ing3	NM_200937	58136
chr5	21899104	21906330	-	zgc:92599	NM_001004607	-45386
chr21	25176022	25182014	-	wbscr27	NM_001040381	-61935
chr4	9668647	9679879	+	ing3	NM_200937	58017
chr4	9668647	9679879	+	ing3	NM_200937	52961
chr4	9668647	9679879	+	ing3	NM_200937	82158
chr5	21899104	21906330	-	zgc:92599	NM_001004607	-45232
chr7	60051452	60065223	-	larp7	NM_199930	-17909
chr13	13791398	13803591	+	rpia	NM_001007289	-89738
chr9	25149619	25153972	-	zgc:154110	NM_001077543	-91428
chr9	42763195	42814463	+	ctdsp1	NM_001020715	71637
chr17	16139360	16165798	-	hmbox1a	NM_001030264	-64898
chr18	39566754	39572582	-	zgc:153717	NM_001076747	33877
chr6	39991622	39994310	-	zgc:101803	NM_001006051	46903
chr17	16139360	16165798	-	hmbox1a	NM_001030264	-67867
chr17	16139360	16165798	-	hmbox1a	NM_001030264	-68376
chr18	4486412	4495060	+	cog8	NM_001013506	54618
chr2	32223429	32231393	-	abcf2a	NM_201315	45037
chr7	60051452	60065223	-	larp7	NM_199930	-8318
chr20	25669076	25674757	-	si:dkeyp-117h8.4	NM_001082878	12117
chr7	60051452	60065223	-	larp7	NM_199930	66510
chr18	39566754	39572582	-	zgc:153717	NM_001076747	37786
chr18	39566754	39572582	-	zgc:153717	NM_001076747	49974
chr11	427074	432517	+	zgc:153788	NM_001045347	17567
chr5	58361033	58373672	-	tia1	NM_212628	25256
chr10	17402409	17463245	+	sppl3	NM_001015068	-67917
chr5	58361033	58373672	-	tia1	NM_212628	-26158
chr5	58361033	58373672	-	tia1	NM_212628	25151
chr19	43762290	43765119	-	si:ch211-191i18.3	NM_001082932	48319
chr18	6942058	6944417	-	si:dkey-238c7.16	NM_001044882	85185
chr20	3351702	3358487	-	marcksa	NM_001024404	75620
chr11	427074	432517	+	zgc:153788	NM_001045347	94282
chr19	12744069	12767856	-	pabpc1b	NM_200882	75269
chr1	59938138	59962020	-	zgc:123246	NM_001037694	99991
chr24	37889525	37896283	+	arf1l	NM_201480	85057
chr3	36261708	36271848	-	prkar1aa	NM_001009989	-24957
chr21	22075720	22132257	-	rb1	NM_001077780	-89450
chr24	41229797	41240424	+	stub1	NM_199674	-50872
chr19	37007181	37041025	-	zgc:101724	NM_001024098	23168
chr2	49569955	49594175	-	cdc34b	NM_001002688	86110
chr7	32708928	32725638	+	ctdspl2b	NM_001089326	14895
chr21	22075720	22132257	-	rb1	NM_001077780	21789
chr24	12531618	12591514	-	pdcd6	NM_200950	40598
chr4	7452005	7489114	-	adipor2	NM_001025506	43103
chr4	7452005	7489114	-	adipor2	NM_001025506	44651
chr4	7452005	7489114	-	adipor2	NM_001025506	45372
chr4	7452005	7489114	-	adipor2	NM_001025506	44777
chr4	7452005	7489114	-	adipor2	NM_001025506	41638
chr4	7452005	7489114	-	adipor2	NM_001025506	39289
chr4	7452005	7489114	-	adipor2	NM_001025506	44218
chr3	2105364	2105837	+	zgc:73359	NM_200837	31610
chr1	48008	53546	-	pcid2	NM_001007381	6055
chr3	40896844	40927744	-	foxk1	NM_199902	-96236
chr19	43748206	43756754	+	si:ch211-191i18.1	NM_001044944	31406
chr8	7472976	7488370	-	zgc:110231	NM_001020576	4982
chr10	11364098	11467319	+	zgc:56702	NM_201103	87755
chr3	53183035	53241705	+	slc27a1a	NM_001013537	-55047
chr20	16922393	16925201	+	nfkbiaa	NM_213184	10879
chr17	738379	755824	-	arhgap11a	NM_213316	27874
chr10	30871372	31602225	+	ntm	NM_001003852	-23965
chr12	20241114	20247969	-	tefa	NM_131400	42185
chr16	36602962	36612257	-	rcc1	NM_213178	-94528
chr10	6221835	6234473	-	zgc:112045	NM_001024412	-16983
chr10	30871372	31602225	+	ntm	NM_001003852	11580
chr13	28233328	28487458	-	smap1	NM_001077778	-47836
chr10	16980963	16985013	+	ywhah	NM_213164	-2640
chr15	46726685	46906017	-	mpzl3	NM_213169	1106
chr16	36602962	36612257	-	rcc1	NM_213178	-94528
chr16	58602563	58757403	+	zgc:76869	NM_214733	-37058
chr16	58602563	58757403	+	zgc:76869	NM_214733	-36945
chr6	38811052	38824168	+	bin2b	NM_199796	-25376
chr8	25567675	25583128	-	prok1	NM_001105698	-13253
chr5	70733315	70747823	-	b4galt4	NM_001007401	-83563
chr4	11308221	11350591	-	zgc:63566	NM_201169	55999
chr8	24234945	24241572	+	mapre1l	NM_199864	85843
chr8	24234945	24241572	+	mapre1l	NM_199864	-63494
chr16	5458618	5475815	-	zgc:63827	NM_201200	77001
chr16	5458618	5475815	-	zgc:63827	NM_201200	31632
chr19	32988502	33011013	-	LOC566469	NM_001100022	-46240
chr19	32988502	33011013	-	LOC566469	NM_001100022	-59608
chr19	32988502	33011013	-	LOC566469	NM_001100022	-59509
chr19	49493932	49503794	-	cdca8	NM_001007456	15251
chr9	30669929	30676936	-	zgc:66415	NM_200526	-74539
chr9	30669929	30676936	-	zgc:66415	NM_200526	45122
chr9	30669929	30676936	-	zgc:66415	NM_200526	83613
chr18	48099850	48116811	+	yif1b	NM_001007334	22954
chr13	28233328	28487458	-	smap1	NM_001077778	-47836
chr8	583730	589222	-	zgc:101664	NM_001006084	-77813
chr23	34358971	34496541	+	zgc:91802	NM_001005584	-39143
chr15	46726685	46906017	-	mpzl3	NM_213169	1106
chr8	583730	589222	-	zgc:101664	NM_001006084	-77813
chr2	9544392	9568856	+	pcyt1aa	NM_001017634	30554
chr7	57865783	57870015	-	zgc:153723	NM_001076656	24645
chr19	32839384	32953290	-	fam65b	NM_001045026	97017
chr14	53115974	53147635	+	ube2d2	NM_199952	37636
chr16	37622774	37750475	-	ptprub	NM_001002299	-46826
chr16	37622774	37750475	-	ptprub	NM_001002299	-37506
chr15	46726685	46906017	-	mpzl3	NM_213169	1106
chr12	20241114	20247969	-	tefa	NM_131400	42185
chr19	39406836	39476388	+	nxph1	NM_001002733	-30079
chr15	29806667	30114026	-	msi2b	NM_201109	91936
chr18	20423091	20454832	-	asz1	NM_200230	81610
chr25	24248135	24249419	-	phlda2	NM_001020596	-67926
chr5	33961504	33973647	-	dab2	NM_205757	-15400
chr19	11487135	11521267	-	tpm3	NM_205676	-37194
chr21	29032630	29037253	-	zgc:158856	NM_001080176	-20909
chr23	28974276	28975099	+	sst3	NM_001045431	-72425
chr25	37363668	37364541	+	zgc:110216	NM_001013477	-56117
chr3	39468919	39483264	-	zgc:100868	NM_001003526	78897
chr7	40837602	40853079	+	tnnt3b	NM_181653	59087
chr1	18391422	18407445	+	tmem192	NM_001102393	3383
chr13	31616798	31621208	-	pgam1a	NM_198804	94555
chr18	20341477	20346693	+	wee2	NM_001044902	64913
chr5	38330889	38339672	+	ppp1r14aa	NM_001017863	-3216
chr18	20341477	20346693	+	wee2	NM_001044902	-31745
chr5	33961504	33973647	-	dab2	NM_205757	-15400
chr17	43973116	44048574	+	ktn1	NM_200081	-4139
chr19	20757240	20776178	+	oxnad1	NM_001110456	-53446
chr19	20757240	20776178	+	oxnad1	NM_001110456	-49534
chr19	20757240	20776178	+	oxnad1	NM_001110456	-50093
chr2	54979657	55010979	+	rab12	NM_001020630	80598
chr5	31291003	31305901	+	tsc1a	NM_200052	-25738
chr5	31291003	31305901	+	tsc1a	NM_200052	-14422
chr5	31291003	31305901	+	tsc1a	NM_200052	-25626
chr5	29077527	29078900	+	zgc:110380	NM_001017660	93443
chr5	29077527	29078900	+	zgc:110380	NM_001017660	56783
chr7	40837602	40853079	+	tnnt3b	NM_181653	59087
chr23	34121569	34141985	+	cs	NM_199598	87902
chr23	34121569	34141985	+	cs	NM_199598	91560
chr8	20976906	20987559	+	mknk2b	NM_194402	61778
chr8	20976906	20987559	+	mknk2b	NM_194402	39833
chr8	20976906	20987559	+	mknk2b	NM_194402	37116
chr8	20976906	20987559	+	mknk2b	NM_194402	61655
chr8	20976906	20987559	+	mknk2b	NM_194402	-21500
chr8	20976906	20987559	+	mknk2b	NM_194402	39962
chr8	20976906	20987559	+	mknk2b	NM_194402	61558
chr7	32708928	32725638	+	ctdspl2b	NM_001089326	14895
chr8	34751218	34906432	-	pbx3b	NM_131616	12697
chr14	22823353	22848032	+	ctbp1	NM_131714	82099
chr19	20757240	20776178	+	oxnad1	NM_001110456	-49534
chr19	20757240	20776178	+	oxnad1	NM_001110456	-53446
chr19	20757240	20776178	+	oxnad1	NM_001110456	-50093
chr2	23298623	23304671	+	crsp7	NM_213059	-7605
chr2	23298623	23304671	+	crsp7	NM_213059	-22466
chr20	14012840	14028991	-	si:ch211-223m11.2	NM_001044869	-51613
chr14	32882348	32886494	-	zic3	NM_001001950	-32164
chr17	43973116	44048574	+	ktn1	NM_200081	-4139
chr17	43973116	44048574	+	ktn1	NM_200081	-4139
chr20	14012840	14028991	-	si:ch211-223m11.2	NM_001044869	-51613
chr14	32882348	32886494	-	zic3	NM_001001950	-32164
chr8	33224977	33234047	-	lipg	NM_200128	3592
chr17	27272337	27278171	-	yth2	NM_200250	83897
chr11	444188	459293	-	zgc:77375	NM_205631	49786
chr11	11235324	11242476	-	urah	NM_001045452	9329
chr9	31397975	31404523	-	asb11	NM_214792	-68986
