# Supplementary material for: Genome Wide Analysis Reveals Zic3 Interaction with Distal Regulatory Elements of Stage Specific Developmental Genes in Zebrafish
Source: PLoS Genet. 2013 Oct 31;9(10):e1003852. doi: 10.1371/journal.pgen.1003852 (PMC3814314; doi:10.1371/journal.pgen.1003852)
Supplement: Table S6 — GO enrichment of microarray genes with ChIP-seq peak at 8 hpf. List of enriched GO terms among genes differentially regulated in microarray and associated with at least one peak in ChIP-seq (Zic3 target genes) at 8 hpf. (XLS) [file pgen.1003852.s014.xls]

## Sheet: DAVID_ChIP vs microarray GO BP_
Table S6. GO enrichment of microarray genes with peaks
Biological Process
Category	Term	Count	%	PValue	Genes	List Total	Pop Hits	Pop Total	Fold Enrichment	Bonferroni	Benjamini	FDR
GOTERM_BP_FAT	GO:0006323~DNA packaging	8	1.1994	0.00188499	SETA, NAP1L4A, SETB, ZGC:110380, ZGC:66430, NCAPH2, ZGC:110216, TOP2A	324	42	7504	4.41152	0.807402	0.807402	2.88693
GOTERM_BP_FAT	GO:0043933~macromolecular complex subunit organization	15	2.24888	0.00352278	SETA, EIF6, XPO6, ZGC:110216, GFM2, CSE1L, NAP1L4A, GTF2F1, ZGC:66430, TUBD1, SETB, ZGC:110380, SI:DKEY-171O17.2, SI:DKEY-72L14.8, TAF9	324	144	7504	2.41255	0.954078	0.785706	5.33175
GOTERM_BP_FAT	GO:0051276~chromosome organization	15	2.24888	0.00375165	SETA, AEBP2, CBX1A, ZGC:110216, SMC2, SMC4, SI:CH211-51M24.3, ASF1BA, NAP1L4A, ZGC:66430, SETB, ZGC:110380, NCAPH2, TOP2A, SUV420H1	324	145	7504	2.39591	0.962422	0.665053	5.66877
GOTERM_BP_FAT	GO:0006333~chromatin assembly or disassembly	9	1.34933	0.00583851	SI:CH211-51M24.3, SETA, ASF1BA, NAP1L4A, CBX1A, SETB, ZGC:110380, ZGC:66430, ZGC:110216	324	64	7504	3.25694	0.993976	0.721403	8.69046
GOTERM_BP_FAT	GO:0030916~otic vesicle formation	5	0.749625	0.00944537	MSXE, SPARC, HNF1BA, STM, DLX4B	324	20	7504	5.79012	0.999748	0.748631	13.7005
GOTERM_BP_FAT	GO:0045860~positive regulation of protein kinase activity	4	0.5997	0.0163826	ZGC:158263, SI:CH211-191I18.3, AXIN1, SMARCA4	324	13	7504	7.12631	0.999999	0.872554	22.6217
GOTERM_BP_FAT	GO:0043085~positive regulation of catalytic activity	6	0.89955	0.0180341	HDR, ZGC:158263, SI:CH211-191I18.3, ZGC:114200, AXIN1, SMARCA4	324	36	7504	3.86008	1	0.862747	24.6144
GOTERM_BP_FAT	GO:0007242~intracellular signaling cascade	28	4.1979	0.018115	ARF1L, SI:DKEY-114G7.4, GNA13B, ZGC:110231, ASB11, SI:CH211-191I18.3, ROCK2B, ZGC:158741, RASGEF1BB, AXIN1, RAB2A, DVL2, RABL3, ARL8, RACGAP1, RASL11B, NRAS, ARHGAP29B, SI:DKEY-110C1.7, RASSF1, PLCG2, IKBKG, RAP1A, RAB12, RAP1B, MAPK14A, ZGC:153788, SMARCA4	324	411	7504	1.57784	1	0.830221	24.7108
GOTERM_BP_FAT	GO:0007243~protein kinase cascade	5	0.749625	0.0208378	IKBKG, SI:CH211-191I18.3, MAPK14A, AXIN1, SMARCA4	324	25	7504	4.6321	1	0.78389	27.8879
GOTERM_BP_FAT	GO:0006007~glucose catabolic process	7	1.04948	0.0214008	ZGC:64133, GAPDHS, HIBADHA, ZGC:153973, HK1, RPIA, PGAM1A	324	51	7504	3.17889	1	0.766073	28.5289
GOTERM_BP_FAT	GO:0019318~hexose metabolic process	9	1.34933	0.0226726	GALK2, ZGC:64133, GAPDHS, ZGC:101116, HIBADHA, ZGC:153973, HK1, RPIA, PGAM1A	324	81	7504	2.57339	1	0.760709	29.9576
GOTERM_BP_FAT	GO:0042472~inner ear morphogenesis	6	0.89955	0.0248175	MSXE, SLC12A2, SPARC, HNF1BA, STM, DLX4B	324	39	7504	3.56315	1	0.768367	32.3065
GOTERM_BP_FAT	GO:0048562~embryonic organ morphogenesis	9	1.34933	0.0258398	MSXE, SLC12A2, EIF3EA, SPARC, HNF1BA, STM, AXIN1, DLX4B, SMARCA4	324	83	7504	2.51138	1	0.760313	33.4
GOTERM_BP_FAT	GO:0006396~RNA processing	16	2.3988	0.0264274	RNASEN, PRPF31, EXOSC8, CSTF3, SI:CH211-105D11.3, EXOSC9, CRNKL1, EXOSC5, WTAP, PRPF4, CCDC76, ZGC:123019, LARP7, SRRM1, PTBP2, RBM25	324	201	7504	1.84362	1	0.727187	34.021
GOTERM_BP_FAT	GO:0042471~ear morphogenesis	6	0.89955	0.0273973	MSXE, SLC12A2, SPARC, HNF1BA, STM, DLX4B	324	40	7504	3.47407	1	0.720959	35.0341
GOTERM_BP_FAT	GO:0043049~otic placode formation	4	0.5997	0.0291655	MSXE, HNF1BA, STM, DLX4B	324	16	7504	5.79012	1	0.725282	36.8439
GOTERM_BP_FAT	GO:0005996~monosaccharide metabolic process	9	1.34933	0.0293034	GALK2, ZGC:64133, GAPDHS, ZGC:101116, HIBADHA, ZGC:153973, HK1, RPIA, PGAM1A	324	85	7504	2.45229	1	0.709569	36.9831
ZFIN anatomy
Category	Term	Count	%	PValue	Genes	List Total	Pop Hits	Pop Total	Fold Enrichment	Bonferroni	Benjamini	FDR
ZFIN_ANATOMY	proliferative region	17	2.54873	8.93006e-05	SKP2, CDC20, AURKB, RACGAP1, TACC3, SMC2, ATP6V1D, ZIC3, SMC4, SI:DKEYP-117H8.4, ASF1BA, CDCA8, MAD2L1, PLK1, RASSF1, KPNA2, TOP2A	467	114	9822	3.13637	0.0291272	0.0291272	0.121053
ZFIN_ANATOMY	pectoral fin musculature	47	7.04648	0.000410641	NDUFB4, MSXE, HIG1, ME3, ETV5B, LIMA1, DLDH, ATP1A1A.4, PPDPFA, CLSTN1, HK1, RCC1, CORO1CA, TPM3, ZGC:101858, SI:CH211-170D8.2, ZGC:66317, RP42-PEN, PHLDA2, PHC2, SLC43A1A, UBTFL, NDUFA9, BYSL, SPAG1, SKP2, KTN1, TNNT3B, SEPN1, TACC3, TMED9, SMC2, ADKA, SMC4, ZGC:64133, SI:DKEYP-117H8.4, ARHGAP29B, CX43.4, CALM3B, NAP1L4A, PLK1, ZGC:63569, PRICKLE2, FARSB, RRS1, PDIP5, TRIM55A	467	582	9822	1.69847	0.127114	0.0657162	0.555528
ZFIN_ANATOMY	whole organism	203	30.4348	0.00301481	ZGC:101664, XRCC3, GNA13B, RNASEH1, AURKB, WTAP, EIF4G2B, MAK16, ILK, VENT, SAP30L, SUPT5H, OTUB1L, ZGC:112356, HMG20B, MARCKSA, BCL2L10, CX43.4, RCC2, MAPK4, EIF2S2, NLE1, TGIF1, RAB12, SUV420H1, TPST1, CHKB, NOC3L, SI:DKEY-177P2.6, ASB11, ACAT2, MYBL2, HNF1BA, NAA35, PFN2, CACYBP, ZGC:110380, SI:DKEY-171O17.2, OEP, ZGC:92763, ZGC:110788, SEC23IP, PCYT1AA, SPPL3, OSGEP, ZGC:101803, CDC20, SEPN1,…	467	3653	9822	1.16877	0.631904	0.283328	4.01252
ZFIN_ANATOMY	pharyngeal arch 3-7 skeleton	46	6.89655	0.00593882	TUFM, EIF6, MSXE, HIG1, ETV5B, DLDH, NOC3L, CLSTN1, GIPC2, RCC1, CORO1CA, ID2A, ROCK2B, ALCAMB, SI:CH211-170D8.2, SETB, ZGC:66317, RP42-PEN, HHIP, ZGC:64042, SLC43A1A, BYSL, SPAG1, SKP2, SEPN1, SPARC, TMED9, SMC2, ADKA, SMC4, SI:DKEYP-117H8.4, KRT18, MAD2L1, CX43.4, NAP1L4A, PLK1, ZGC:63569, RASSF1, MAPK4, PABPC1B, PRICKLE2, FARSB, RRS1, MAPK14A, ID3, PDCD6	467	647	9822	1.49533	0.860767	0.389149	7.76125
ZFIN_ANATOMY	ventral mesoderm	27	4.04798	0.00787452	UGP2B, CLTCA, AP2M1A, HDR, HK1, ILDR2, CORO1CA, TNIKB, SERINC5, DAB2, SI:CH211-170D8.2, OEP, MTMR8, COPEB, PHLDA2, SLC12A2, SKP2, SEPN1, SLC9A3R1, ATP1B3A, BCL2L10, CALM3B, RASSF1, JUN, PRICKLE2, RAP1B, KLF4	467	331	9822	1.71561	0.926963	0.407472	10.1678
ZFIN_ANATOMY	unspecified	228	34.1829	0.00946171	TMEM19, GNA13B, AURKB, MXI1, CAB39L1, CDCA8, ILK, KCNK5, LSM4, VENT, ZGC:101026, SUPT5H, PITX2, NCF1, PCID2, RCOR1, BYSL, SPAG1, SKP2, VTI1B, POLB, SYNJ2BP, SARS2, SI:CH211-51M24.3, PCF11, SPAG7, KRT18, MAD2L1, TRMT11, SERBP1, PDIP5, TGIF1, NFKBIAA, RAD23B, STK17B, HNF1BA, RCC1, TAGLN2, ACP1, NAA35, PFN2, SERINC5, ZGC:64105, KBTBD4, ZGC:56106, OEP, ZGC:110680, DVL2, AEBP2, NPLOC4, SRP54, ZC3H15, …	467	4256	9822	1.12672	0.957008	0.408123	12.0976
ZFIN_ANATOMY	periderm	30	4.49775	0.00972001	TPST1, LIMA1, TP63, GIPC2, MXI1, TAGLN2, CORO1CA, ROCK2B, ALCAMB, AQP3A, OEP, ZGC:66317, SDF4, ZGC:64042, ZGC:77836, ZGC:92533, PIM1, SPAG1, SEPN1, SPARC, TMED9, SLC9A3R1, WIPI1, ADKA, ARHGAP29B, KRT18, IKBKG, NFKBIAA, KLF4, ALOX12	467	387	9822	1.6304	0.960563	0.369893	12.408
ZFIN_ANATOMY	optic tectum	58	8.69565	0.0101882	ATP5D, EIF6, DNAJC5AA, LIMA1, ATP1A1A.4, TPBGL, ID2A, ZIC3, ALCAMB, SETB, ATP5O, HHIP, TOP2A, COPEB, PITX2, EXOSC8, BYSL, SKP2, KTN1, SLC9A3R1, TACC3, ADKA, CTNNBIP1, ARHGAP29B, MAD2L1, CX43.4, MAPK4, FARSB, NLE1, MINAL, ADOB, TPST1, TUFM, MSXE, DLDH, NOC3L, RCC1, CORO1CA, TPM3, ZGC:101858, SI:DKEY-171O17.2, RPIA, FKRP, TMEM59L, NDUFA9, GINS3, SEPN1, ATP1B3A, ZGC:64133, GAPDHS, SI:DKEYP-117H8.4, …	467	884	9822	1.37994	0.966278	0.34538	12.968
ZFIN_ANATOMY	notochord	46	6.89655	0.0198521	SYVN1, MXRA8A, UGP2B, HDR, CLTCA, AP2M1A, RDH10B, MXI1, ID2A, ROCK2B, TPM3, RASGEF1BB, RGMB, CSAD, OEP, GOLGA5, SDF4, COPEB, RAB2A, SLC12A2, LFT1, PIM1, SEPN1, SPARC, SLC9A3R1, TMED9, WIPI1, TSC1A, RASL11B, KRT18, CX43.4, CALM3B, ZGC:63569, LASS2, PABPC1B, PRICKLE2, PGM1, LIPG, PDIP5, RAP1B, ADIPOR1A, ID3, PDCD6, PPP1R3CA, CDKRAP3, ALOX12	467	695	9822	1.39205	0.998689	0.521672	23.8121
ZFIN_ANATOMY	anterior axial hypoblast	11	1.64918	0.0254935	LFT1, ASB11, FZD8B, MTMR8, SEPN1, ID3, TAGLN2, STM, KLF4, RNPEP, ATP1B3A	467	104	9822	2.22455	0.999806	0.574622	29.5494
ZFIN_ANATOMY	retina	73	10.9445	0.0325932	ATP5D, MKRN1, LIMA1, ETV5B, DNAJC5AA, OPN1SW2, ATP1A1A.4, ILDR2, CKBB, ID2A, ZIC3, TNIKB, ALCAMB, ATP5O, TOP2A, PHC2, EXOSC8, BYSL, SPAG1, SKP2, KTN1, TACC3, SLC9A3R1, ADKA, BCL2L10, MAD2L1, CX43.4, MAPK4, FARSB, MINAL, NLE1, ADIPOR1A, IFT88, STM, SH3GL2, SMARCA4, TUFM, ZMYND11, MSXE, DLDH, ZGC:73359, CSNK1G2A, NOC3L, GIPC2, RCC1, CORO1CA, ZGC:101858, RASGEF1BB, RGS12, FAM107B, RPIA, FKRP, TMEM59…	467	1230	9822	1.24825	0.999983	0.631052	36.2012
ZFIN_ANATOMY	alar plate midbrain region	28	4.1979	0.0363024	TPST1, ATP5D, EIF6, TUFM, MSXE, NOC3L, RCC1, CORO1CA, ZGC:101858, TPM3, ATP5O, PITX2, EXOSC8, NDUFA9, GINS3, BYSL, SKP2, KTN1, SLC9A3R1, ATP1B3A, GAPDHS, ZGC:64133, CX43.4, NAP1L4A, PLK1, PABPC1B, FARSB, NLE1	467	396	9822	1.48712	0.999995	0.639394	39.4402
ZFIN_ANATOMY	EVL	15	2.24888	0.0453011	ELOVL1A, ZGC:77836, ZGC:92533, SPAG1, XKRX, TAGLN2, SLC9A3R1, ROCK2B, ALCAMB, KRT18, AQP3A, OEP, ZGC:64042, KLF4, ALOX12	467	179	9822	1.76247	1	0.692837	46.6759
ZFIN_ANATOMY	immature eye	41	6.14693	0.0742522	TPST1, TUFM, ATP5D, EIF6, ZMYND11, MSXE, ETV5B, DLDH, ATP1A1A.4, NOC3L, RCC1, ID2A, ZGC:101858, ALCAMB, SI:DKEY-171O17.2, MTMR8, RPIA, FKRP, PITX2, EXOSC8, NDUFA9, BYSL, SKP2, KTN1, TMED9, ADKA, ZGC:64133, CCT4, MAD2L1, CX43.4, CALM3B, NAP1L4A, PLK1, RASSF1, PABPC1B, PRICKLE2, FARSB, MINAL, RRS1, ZGC:154110, STM	467	668	9822	1.29089	1	0.838642	64.8818
ZFIN_ANATOMY	muscle pioneer	5	0.749625	0.0892344	JUN, CLSTN1, PPDPFA, HHIP, ROCK2B	467	36	9822	2.92113	1	0.872872	71.8537
ZFIN_ANATOMY	lateral line system	17	2.54873	0.0910108	ZGC:77836, PPDPFA, CLSTN1, SPAG1, MXI1, SMC4, GAPDHS, CALM3B, ZGC:63569, PABPC1B, JUN, PDIP5, STM, NFKBIAA, PHLDA2, KLF4, PHC2	467	234	9822	1.52797	1	0.861106	72.5892
ZFIN_ANATOMY	epidermis	24	3.5982	0.0930411	TPST1, LIMA1, ZGC:77836, UGP2B, ZGC:92533, TP63, SPARC, SEPN1, SLC9A3R1, TAGLN2, TMED9, CORO1CA, NAA35, VASP, ADKA, ALCAMB, JUN, AQP3A, ZGC:66317, ID3, SDF4, ZGC:64042, PHLDA2, ALOX12	467	362	9822	1.39439	1	0.85065	73.4081
ZFIN_ANATOMY	telencephalon	44	6.5967	0.0956642	MKRN1, DNAJC5AA, LIMA1, ETV5B, GPR161, NOC3L, CLSTN1, HK1, FZD8B, CKBB, MXI1, CORO1CA, ID2A, ZIC3, SKIA, SERINC5, ALCAMB, SI:CH211-170D8.2, MTMR8, FKRP, COPEB, PHC2, CD9A, TMEM59L, SLC9A3R1, ADKA, BCL2L10, CSNK1DA, ATP1B3A, RASL11B, GAPDHS, ARHGAP29B, CX43.4, YWHAH, CALM3B, PABPC1B, MAPK4, PRICKLE2, DDB2, ZGC:77375, ADOB, ID3, SH3GL2, SMARCA4	467	740	9822	1.25056	1	0.842619	74.4325
